# Supplementary material for: Genetic Effects on DNA Methylation and Its Potential Relevance for Obesity in Mexican Americans
Source: PLoS One. 2013 Sep 13;8(9):e73950. doi: 10.1371/journal.pone.0073950 (PMC3772804; doi:10.1371/journal.pone.0073950)
Supplement: Table S5 — Complete association analysis between age and DNA methylation at 395 CpG sites. (XLSX) [file pone.0073950.s005.xlsx]

## Sheet: Sheet1
CpG_Site	Beta	P-value_nominal	P-value_corrected	Q-value	FDR
FZD9_E458_F	0.0394367	8.0554e-08	3.18188e-05	2.15091e-05	0.00040555
MYOD1_E156_F	0.0351982	2.75409e-06	0.00108787	0.00026623	0.00040555
HS3ST2_E145_R	0.0329674	3.12356e-06	0.00123381	0.000277536	0.00964972
CARD15_P302_R	-0.0292096	6.7e-05	0.026465	0.00375105	0.00964972
CDH11_P354_R	0.0296825	9.29e-05	0.0366955	0.00452163	0.00964972
IL17RB_E164_R	0.0288491	0.0001116	0.044082	0.00496363	0.0107412
IL6_E168_F	0.0288321	0.0001534	0.060593	0.00581609	0.0107412
DES_E228_R	0.0278031	0.0001921	0.0758795	0.00640802	0.0164006
ACVR1_E328_R	-0.024071	0.0003995	0.157803	0.00937266	0.0164006
IL16_P93_R	-0.02584	0.0004173	0.164833	0.00954717	0.0164006
PLSCR3_P751_R	0.0256407	0.0004485	0.177157	0.00983301	0.0164006
SLC5A8_E60_R	0.0267801	0.0005272	0.208244	0.0104582	0.0164006
BMP4_P199_R	0.0263693	0.0005382	0.212589	0.0105362	0.0164006
KCNK4_E3_F	0.0247301	0.0006165	0.243517	0.0110375	0.0164006
HTR1B_E232_R	0.0269267	0.0006223	0.245809	0.0110712	0.0444414
MAP2K6_P297_R	0.0258243	0.0009368	0.370036	0.0148027	0.0444414
MT1A_P600_F	0.0250359	0.0009749	0.385086	0.0151989	0.0444414
IGFBP1_E48_R	0.0246831	0.0011219	0.44315	0.0166329	0.0494686
WNT1_P79_R	0.0248714	0.0013168	0.520136	0.018445	0.0494686
NRG1_P558_R	0.0228623	0.0018586	0.734147	0.0225715	0.0494686
CALCA_E174_R	0.0240957	0.0018776	0.741652	0.0226963	0.0494686
CDH13_P88_F	0.0233723	0.0021409	0.845655	0.0243147	0.0494686
MFAP4_P10_R	0.023679	0.0022345	0.882628	0.0248439	0.0494686
IL6_P213_R	0.0235886	0.0024123	0.952859	0.0257901	0.0494686
NFKB1_P496_F	-0.0232729	0.0024195	0.955703	0.0258269	0.0979917
ZNF215_P71_R	0.0235348	0.0033181	1	0.032261	0.0979917
NOTCH3_P198_R	0.0221455	0.0038441	1	0.0355213	0.0979917
MFAP4_P197_F	0.0223215	0.0041325	1	0.0371753	0.0979917
CDK10_P199_R	0.0217283	0.0047154	1	0.0402644	0.0979917
BDNF_P259_R	0.021833	0.0048358	1	0.0408637	0.0979917
PENK_P447_R	0.0215615	0.0048753	1	0.0410577	0.0979917
IGFBP1_P12_R	0.0218516	0.0049899	1	0.0416129	0.099793
DCC_P177_F	0.0209598	0.0054902	1	0.0439477	0.099793
TP73_P945_F	0.0213335	0.0057378	1	0.0450353	0.135477
AIM2_P624_F	-0.0202613	0.0069093	1	0.0507835	0.135477
MMP9_P189_F	0.0202434	0.0069921	1	0.0511623	0.135477
IPF1_P234_F	0.0210451	0.0072608	1	0.0523684	0.137803
PENK_E26_F	0.0205399	0.0082153	1	0.0564334	0.137803
FRZB_E186_R	0.0205561	0.008416	1	0.0572394	0.137803
RARA_P176_R	0.0202244	0.0089135	1	0.0591702	0.137803
CD82_P557_R	-0.0195909	0.0099915	1	0.063052	0.137803
FAT_P279_R	0.0195182	0.0102316	1	0.0638649	0.137803
TSP50_P137_F	0.0197007	0.0103591	1	0.0642895	0.178368
SOX17_P303_F	0.019093	0.0135611	1	0.0757249	0.178368
TSP50_E21_R	0.0187779	0.0139924	1	0.0770923	0.178368
ABL1_P53_F	0.0192595	0.0142439	1	0.077873	0.178368
TPEF_seq_44_S88_R	0.0181243	0.0144282	1	0.0784375	0.178368
EPHA5_P66_F	0.0186583	0.0154162	1	0.0813588	0.178368
MEST_P62_R	0.0184523	0.0168756	1	0.0853742	0.178368
DSC2_E90_F	0.0170756	0.0175584	1	0.087141	0.178368
JAK3_P1075_R	-0.0179997	0.0177964	1	0.0877411	0.178368
WNT10B_P823_R	0.0182417	0.0190753	1	0.0908354	0.178368
ALOX12_E85_R	0.017116	0.0192922	1	0.0913393	0.178368
PPAT_E170_R	0.0179357	0.0193951	1	0.0915764	0.178368
PTHR1_P258_F	-0.0177277	0.0196243	1	0.0920998	0.178368
HOXA9_P1141_R	0.0185223	0.0197194	1	0.0923151	0.178368
PGF_P320_F	0.0178103	0.0200513	1	0.0930583	0.178368
LMO2_P794_R	0.0173451	0.020571	1	0.0941964	0.178368
DBC1_E204_F	0.0171494	0.0215817	1	0.0963252	0.178368
SPI1_P48_F	0.0177033	0.0222108	1	0.0975967	0.178368
SMO_P455_R	0.0179105	0.0232777	1	0.0996652	0.178368
EGFR_P260_R	0.0177603	0.0234118	1	0.0999178	0.178368
ITGB1_P451_F	-0.0177438	0.0237269	1	0.100505	0.204223
COL1A1_P5_F	0.0175295	0.025715	1	0.104612	0.204223
RUNX1T1_P103_F	-0.0174035	0.0272575	1	0.107582	0.204223
OPCML_P71_F	0.0174482	0.0273337	1	0.107724	0.204223
ALOX12_P223_R	0.0160891	0.0278445	1	0.108666	0.204223
GPATC3_P410_R	0.0169817	0.0289251	1	0.110599	0.204223
PYCARD_P150_F	0.0169829	0.0309606	1	0.114036	0.204223
IRF5_E101_F	0.0159515	0.0313714	1	0.1147	0.204223
PTCH2_P568_R	0.0164811	0.0315413	1	0.114971	0.204223
ONECUT2_E96_F	0.0164581	0.0317874	1	0.115361	0.204223
IRAK3_P185_F	0.0167153	0.0322252	1	0.116047	0.204223
COL1A2_P407_R	0.0162217	0.0328714	1	0.117041	0.204223
DCC_E53_R	0.0167643	0.033156	1	0.117471	0.204223
MMP14_P13_F	0.0162183	0.0336755	1	0.118246	0.225681
SOX2_P546_F	0.0167975	0.035063	1	0.120516	0.225681
SLC22A3_P634_F	0.0156289	0.0355443	1	0.121282	0.225681
CSF1R_E26_F	-0.0158554	0.0387379	1	0.12609	0.225681
ERN1_P809_R	-0.0154298	0.039279	1	0.126862	0.225681
HHIP_P578_R	0.0157472	0.0393978	1	0.127029	0.225681
ERCC1_P440_R	-0.015762	0.0394511	1	0.127104	0.225681
PEG3_E496_F	0.0162806	0.0395953	1	0.127307	0.395575
IGFBP2_P353_R	0.0152557	0.0445953	1	0.137783	0.395575
CD81_P272_R	0.0153822	0.0462453	1	0.141063	0.395575
LTA_E28_R	0.0146037	0.0470984	1	0.142727	0.395575
SLC5A8_P38_R	0.0155788	0.0472823	1	0.143082	0.395575
MPL_P62_F	-0.015132	0.048979	1	0.146318	0.395575
MLLT4_P1400_F	0.0152047	0.0508105	1	0.149718	0.395575
PITX2_E24_R	0.0153108	0.0511914	1	0.150414	0.395575
SLC22A3_P528_F	0.0148359	0.0528698	1	0.153433	0.395575
EPHB4_E476_R	0.0150462	0.0536188	1	0.154756	0.395575
COL18A1_P494_R	0.0148767	0.0544185	1	0.156153	0.605306
EPO_P162_R	0.0144661	0.0638399	1	0.175356	0.605306
SOX17_P287_R	0.0142786	0.0656033	1	0.178769	0.605306
DIO3_P90_F	0.014378	0.0668174	1	0.181087	0.605306
IFNG_P459_R	-0.0143157	0.0689577	1	0.185114	0.605306
PMP22_P975_F	-0.0137576	0.0814428	1	0.207159	0.605306
FABP3_P598_F	0.0132425	0.0829044	1	0.20959	0.605306
HOXA5_P1324_F	0.012206	0.0869084	1	0.216099	0.605306
PTPN6_P282_R	0.0129911	0.0880051	1	0.217844	0.605306
RET_seq_54_S260_F	0.0121045	0.0902839	1	0.221422	0.605306
SNCG_P53_F	-0.0122238	0.0908016	1	0.222225	0.605306
ADAMTS12_E52_R	0.01342	0.0914391	1	0.22321	0.605306
SOX1_P294_F	0.0130589	0.0926203	1	0.225021	0.605306
PKD2_P287_R	-0.0132282	0.0947622	1	0.228263	0.605306
HOXC6_P585_R	0.0129987	0.0960861	1	0.230239	0.605306
SERPINA5_P156_F	0.0127436	0.0969776	1	0.231558	0.605306
GDF10_P95_R	0.0124948	0.0984679	1	0.233742	0.605306
SEMA3B_E96_F	0.0127627	0.105282	1	0.243412	0.605306
LTB4R_P163_F	-0.0123861	0.105469	1	0.243672	0.605306
PTHLH_P15_R	0.0125048	0.106234	1	0.244724	0.605306
TYK2_P494_F	0.0120375	0.106311	1	0.24483	0.605306
PTHLH_E251_F	0.0124051	0.106312	1	0.244832	0.605306
FLT1_P615_R	0.01245	0.110476	1	0.250453	0.605306
CTSL_P264_R	0.0122648	0.110792	1	0.250872	0.605306
SLC5A5_E60_F	0.0123756	0.113159	1	0.253983	0.605306
TRAF4_P372_F	-0.0121546	0.113983	1	0.255054	0.605306
VAMP8_P241_F	-0.0121921	0.115918	1	0.25754	0.605306
POMC_P400_R	0.0119044	0.118971	1	0.261395	0.605306
CCND1_E280_R	-0.011981	0.127826	1	0.272104	0.605306
CD34_P339_R	0.0116377	0.128827	1	0.273274	0.605306
PDGFRA_E125_F	0.0118765	0.132272	1	0.277234	0.605306
MYLK_P469_R	0.0116836	0.13245	1	0.277436	0.605306
RUNX3_E27_R	0.0117859	0.132783	1	0.277813	0.605306
HOXC6_P456_R	0.0115608	0.135479	1	0.280836	0.605306
ASCL1_P747_F	0.0115926	0.136244	1	0.281685	0.605306
HLA_DPA1_P205_R	-0.0115578	0.13722	1	0.28276	0.605306
ERG_E28_F	0.0114309	0.140741	1	0.286581	0.605306
IPF1_P750_F	0.0111762	0.142088	1	0.288018	0.605306
OGG1_E400_F	0.0111993	0.143778	1	0.289803	0.605306
WNT2_P217_F	0.0112155	0.148514	1	0.294702	0.605306
NPY_E31_R	0.0110898	0.157864	1	0.30394	0.605306
FGFR3_P1152_R	0.0105852	0.158764	1	0.3048	0.605306
FGF9_P862_R	-0.0110162	0.161088	1	0.306998	0.605306
SEPT9_P374_F	-0.0106037	0.17012	1	0.315247	0.605306
SPARC_E50_R	0.0105694	0.173555	1	0.318266	0.605306
TES_P182_F	0.0106274	0.17363	1	0.318331	0.605306
PI3_P1394_R	-0.010505	0.17438	1	0.318982	0.605306
MYBL2_P354_F	0.010676	0.174504	1	0.319088	0.605306
GNMT_P197_F	0.0105637	0.175485	1	0.319934	0.605306
F2R_P839_F	0.0106503	0.175792	1	0.320197	0.605306
HDAC5_E298_F	0.0104604	0.178689	1	0.322661	0.605306
MCM6_E136_F	0.0105939	0.179482	1	0.323328	0.605306
CFTR_P372_R	0.0106927	0.179692	1	0.323505	0.605306
GADD45A_P737_R	0.0103591	0.180255	1	0.323976	0.605306
GFI1_P208_R	-0.010437	0.180394	1	0.324092	0.605306
CD9_P504_F	0.0104257	0.181089	1	0.32467	0.605306
SPI1_E205_F	-0.0103518	0.182579	1	0.325904	0.605306
SEMA3A_P658_R	0.0104109	0.185827	1	0.328555	0.605306
PPARG_P693_F	0.0102872	0.185976	1	0.328675	0.702162
PTGS2_P524_R	0.010335	0.190299	1	0.332695	0.702162
LEFTY2_P561_F	-0.00984	0.199039	1	0.340564	0.702162
CD34_E20_R	0.0101119	0.199724	1	0.341166	0.702162
VAMP8_E7_F	-0.0101146	0.200378	1	0.34174	0.702162
HHIP_P307_R	0.00983	0.200384	1	0.341746	0.702162
TNK1_P41_R	0.0099	0.20411	1	0.344978	0.702162
STAT5A_P704_R	-0.00969	0.204538	1	0.345345	0.702162
MMP7_E59_F	0.00997	0.208725	1	0.348902	0.702162
NOTCH4_E4_F	-0.00972	0.215333	1	0.354373	0.702162
SEMA3F_E333_R	0.0095	0.218084	1	0.356601	0.702162
CRK_P721_F	0.00931	0.218233	1	0.356721	0.702162
CARD15_P665_F	-0.00949	0.221167	1	0.359065	0.702162
MMP19_P306_F	-0.00932	0.224463	1	0.36166	0.702162
IFNGR2_P377_R	0.00937	0.226311	1	0.363097	0.702162
FANCE_P356_R	0.00947	0.228597	1	0.364859	0.702162
PLAT_P80_F	-0.00874	0.228806	1	0.365019	0.702162
SNCG_P98_R	-0.00859	0.233994	1	0.368947	0.702162
COMT_E401_F	0.00915	0.243015	1	0.375563	0.702162
SNURF_P2_R	0.00902	0.247106	1	0.378477	0.702162
ESR1_E298_R	0.00878	0.249785	1	0.380358	0.702162
HS3ST2_P546_F	0.00908	0.250925	1	0.381151	0.702162
APC_E117_R	-0.0089	0.252592	1	0.382305	0.702162
E2F5_P516_R	0.00899	0.254213	1	0.383418	0.702162
SMAD2_P848_R	0.00889	0.255809	1	0.384508	0.702162
SPP1_P647_F	-0.00885	0.257933	1	0.385946	0.702162
SYK_P584_F	-0.0087	0.259393	1	0.386926	0.702162
PLAU_P11_F	0.00868	0.269132	1	0.393316	0.702162
TRIP6_P1274_R	-0.00824	0.272951	1	0.395751	0.702162
PTPRO_P371_F	0.00856	0.27343	1	0.396055	0.702162
FGFR1_P204_F	0.0086	0.274451	1	0.396697	0.702162
SNRPN_seq_12_S127_F	0.00851	0.275796	1	0.397541	0.702162
MLF1_E243_F	0.00858	0.27684	1	0.398193	0.702162
CD86_P3_F	0.00854	0.280804	1	0.400641	0.702162
DLC1_P88_R	0.00834	0.282019	1	0.401384	0.702162
HLA_DOB_E432_R	0.00819	0.287193	1	0.404505	0.702162
EPHA2_P340_R	0.0082	0.287692	1	0.404803	0.702162
FGF9_P1404_F	0.0083	0.287885	1	0.404918	0.702162
CHGA_P243_F	0.00837	0.289001	1	0.405581	0.702162
CYP1B1_P212_F	-0.00817	0.290373	1	0.406392	0.702162
INSR_E97_F	-0.00827	0.291224	1	0.406892	0.795494
IFNGR2_E164_F	0.00794	0.294959	1	0.409426	0.795494
SLC22A18_P472_R	-0.0079	0.299874	1	0.412709	0.795494
GRB7_E71_R	0.00758	0.308394	1	0.418269	0.795494
CCND3_P435_F	-0.00791	0.309118	1	0.418733	0.795494
NES_P239_R	0.00783	0.316613	1	0.423482	0.795494
DLC1_E276_F	0.00774	0.317336	1	0.423933	0.795494
CD40_P372_R	0.00795	0.317433	1	0.423994	0.795494
CLK1_P538_F	0.00782	0.318359	1	0.424571	0.795494
IGF2R_P396_R	-0.0078	0.323276	1	0.427603	0.795494
PDGFA_P78_F	0.00772	0.325541	1	0.428983	0.795494
PALM2_AKAP2_P183_R	0.00733	0.328626	1	0.430847	0.795494
IGF2AS_E4_F	-0.00759	0.335242	1	0.43478	0.795494
DDB2_P613_R	-0.00721	0.341166	1	0.43823	0.795494
CPA4_E20_F	-0.00726	0.346519	1	0.441292	0.795494
PECAM1_P135_F	0.00738	0.347585	1	0.441896	0.795494
FZD9_P175_F	-0.00723	0.354057	1	0.445515	0.795494
ERCC6_P698_R	-0.00716	0.35731	1	0.447307	0.795494
CSF3_P309_R	-0.00702	0.358731	1	0.448084	0.795494
COL1A1_P117_R	0.00707	0.362781	1	0.45028	0.795494
PTCH2_E173_F	0.00721	0.364273	1	0.451081	0.795494
PADI4_E24_F	-0.00704	0.3645	1	0.451203	0.795494
LTA_P214_R	0.00707	0.367531	1	0.452819	0.795494
GUCY2D_P48_R	-0.00696	0.370392	1	0.454331	0.795494
PSCA_E359_F	0.00704	0.372769	1	0.455577	0.795494
LCN2_P86_R	-0.00686	0.373494	1	0.455955	0.795494
HDAC1_P414_R	0.00703	0.376579	1	0.457555	0.795494
LMO2_E148_F	0.00675	0.378073	1	0.458324	0.795494
IGFBP7_P297_F	-0.00683	0.37824	1	0.45841	0.795494
NGFB_P13_F	0.00674	0.395927	1	0.467255	0.795494
HDAC9_P137_R	0.00679	0.3962	1	0.467388	0.795494
ZIM2_P22_F	0.00659	0.397155	1	0.467852	0.795494
EPHA2_P203_F	0.00645	0.399763	1	0.469112	0.795494
TNFRSF10B_P108_R	-0.00649	0.40022	1	0.469332	0.795494
EFNB3_E17_R	-0.00661	0.400788	1	0.469605	0.795494
CALCA_P171_F	0.00659	0.401942	1	0.470158	0.795494
ELL_P693_F	0.00644	0.407908	1	0.472987	0.795494
P2RX7_P119_R	-0.00625	0.407983	1	0.473022	0.795494
CSF3R_P8_F	0.00642	0.40974	1	0.473846	0.795494
LCN2_P141_R	-0.00633	0.42326	1	0.480046	0.795494
CDKN2B_E220_F	-0.00621	0.425047	1	0.480848	0.795494
BLK_P14_F	-0.00619	0.432439	1	0.484121	0.795494
CASP6_P230_R	0.0069	0.43246	1	0.48413	0.795494
PYCARD_P393_F	-0.00604	0.436174	1	0.485749	0.795494
WNT5A_E43_F	0.00605	0.438292	1	0.486665	0.795494
IHH_P246_R	0.00608	0.438297	1	0.486667	0.795494
FGFR2_P266_R	0.00598	0.441504	1	0.488043	0.795494
GSTM2_E153_F	0.00614	0.444677	1	0.489393	0.795494
JUNB_P1149_R	-0.00601	0.444712	1	0.489408	0.795494
PHLDA2_P622_F	0.00558	0.446657	1	0.490229	0.795494
TDGF1_P428_R	0.0056	0.448583	1	0.491038	0.795494
NOS2A_E117_R	-0.00568	0.45286	1	0.49282	0.795494
RARRES1_P57_R	0.00578	0.456356	1	0.494261	0.795494
CASP8_E474_F	0.00585	0.463863	1	0.497308	0.795494
EGR4_E70_F	0.0057	0.471182	1	0.500221	0.795494
GABRA5_P1016_F	0.00561	0.471865	1	0.50049	0.795494
RUNX1T1_E145_R	-0.00556	0.473503	1	0.501132	0.795494
MYCL1_P502_R	0.00556	0.477265	1	0.502598	0.795494
WNT1_E157_F	-0.00548	0.47888	1	0.503223	0.795494
KDR_E79_F	0.00563	0.47933	1	0.503397	0.795494
LAMB1_E144_R	0.00557	0.480584	1	0.50388	0.795494
IGF1_E394_F	-0.00545	0.481285	1	0.504149	0.795494
FGF12_E61_R	0.00547	0.485831	1	0.505882	0.795494
IL10_P85_F	0.00542	0.489532	1	0.507279	0.795494
NNAT_P544_R	0.00533	0.489552	1	0.507286	0.795494
DNMT3B_P352_R	-0.0053	0.49108	1	0.507859	0.795494
ABL2_P459_R	0.00536	0.492102	1	0.50824	0.795494
ERBB3_E331_F	0.00536	0.492803	1	0.508502	0.795494
ARHGAP9_P518_R	0.0052	0.496495	1	0.509869	0.795494
GRB7_P160_R	0.0052	0.498005	1	0.510425	0.795494
IGFBP6_E47_F	0.00527	0.499888	1	0.511115	0.957235
INHA_P1189_F	0.00519	0.508426	1	0.515147	0.957235
CD34_P780_R	0.00507	0.512954	1	0.517256	0.957235
HRASLS_P353_R	0.005	0.514051	1	0.517763	0.957235
GSTM1_P266_F	0.00455	0.530034	1	0.525032	0.957235
DDB2_P407_F	0.00492	0.531496	1	0.525685	0.957235
RUNX3_P247_F	0.0049	0.535255	1	0.527354	0.957235
MMP3_P55_F	-0.00472	0.536447	1	0.527881	0.957235
MET_E333_F	-0.00441	0.536921	1	0.52809	0.957235
CAV1_P169_F	-0.00482	0.537248	1	0.528235	0.957235
AXL_P223_R	-0.00414	0.543058	1	0.530779	0.957235
KLK11_P1290_F	-0.0047	0.543551	1	0.530994	0.957235
ERCC3_P1210_R	-0.00466	0.544325	1	0.531331	0.957235
MPL_P657_F	0.00469	0.545118	1	0.531675	1
MXI1_P1269_F	0.00465	0.552117	1	0.53485	1
PRKCDBP_P352_R	-0.00468	0.552181	1	0.534879	1
CD9_P585_R	-0.00462	0.552223	1	0.534898	1
MEG3_E91_F	0.00465	0.555615	1	0.536421	1
STAT5A_E42_F	0.00452	0.556326	1	0.536739	1
SEPT5_P441_F	0.0044	0.5635	1	0.539923	1
RARA_P1076_R	0.00438	0.567382	1	0.541628	1
CASP6_P201_F	0.00316	0.572318	1	0.543778	1
TMEFF2_P152_R	0.00444	0.575639	1	0.545213	1
DAPK1_E46_R	0.00418	0.59381	1	0.552907	1
WRN_E57_F	-0.00421	0.594467	1	0.553181	1
ID1_P880_F	0.00413	0.59448	1	0.553186	1
HLA_DPA1_E35_R	-0.00408	0.596828	1	0.554161	1
HBII_52_P563_F	0.0041	0.597998	1	0.554644	1
ITK_P114_F	0.00416	0.598727	1	0.554945	1
HGF_E102_R	-0.00384	0.612775	1	0.560666	1
DMP1_P134_F	-0.00374	0.616355	1	0.5621	1
CEBPA_P1163_R	0.00394	0.618988	1	0.563149	1
LMTK2_P1034_F	0.00386	0.619771	1	0.56346	1
CRIP1_P874_R	-0.00378	0.621183	1	0.56402	1
HPSE_P29_F	-0.00371	0.625916	1	0.565885	1
ZAP70_P220_R	0.00383	0.62731	1	0.566432	1
SEMA3B_P110_R	-0.00349	0.636625	1	0.570048	1
IFNG_E293_F	-0.00371	0.638644	1	0.570824	1
SERPINE1_E189_R	0.00357	0.65165	1	0.575756	1
TGFBI_P173_F	0.00347	0.655002	1	0.577008	1
IGFBP5_P9_R	0.00347	0.656308	1	0.577494	1
FLT4_E206_F	-0.00326	0.656662	1	0.577626	1
CDK6_E256_F	-0.0035	0.6576	1	0.577974	1
CDKN1C_P6_R	-0.00337	0.664746	1	0.580608	1
AREG_P217_R	0.00334	0.666934	1	0.581408	1
IL12B_P1453_F	0.00323	0.66945	1	0.582324	1
TRIP6_P1090_F	-0.00326	0.669694	1	0.582413	1
VEGFB_P658_F	-0.00329	0.671795	1	0.583175	1
CSF3R_P472_F	0.00323	0.675867	1	0.584643	1
S100A4_P194_R	-0.00334	0.67778	1	0.585329	1
DNAJC15_E26_R	-0.00322	0.681147	1	0.586531	1
BCAM_P205_F	-0.00317	0.690412	1	0.589804	1
HSD17B12_P97_F	-0.00296	0.691718	1	0.590261	1
COL6A1_P425_F	0.00313	0.692129	1	0.590405	1
MMP10_E136_R	-0.00307	0.697911	1	0.592415	1
PTPRH_E173_F	0.00303	0.698024	1	0.592454	1
FGR_P39_F	-0.00291	0.700928	1	0.593456	1
S100A4_E315_F	0.00301	0.700951	1	0.593464	1
IL1RN_P93_R	-0.00297	0.706289	1	0.595293	1
ER_seq_a1_S60_F	0.00289	0.715145	1	0.598292	1
GJB2_P931_R	0.00286	0.716781	1	0.598841	1
DSP_P36_F	0.00283	0.719176	1	0.599642	1
SH3BP2_E18_F	-0.00278	0.723197	1	0.600979	1
LAMC1_P808_F	-0.00261	0.723244	1	0.600995	1
p16_seq_47_S85_F	-0.00263	0.733967	1	0.604519	1
DUSP4_E61_F	0.00253	0.744945	1	0.608063	1
MCAM_P265_R	-0.00239	0.751602	1	0.610181	1
ALPL_P433_F	-0.00235	0.767426	1	0.615125	1
SPARC_P195_F	-0.00224	0.771439	1	0.616359	1
STK11_P295_R	0.00226	0.775616	1	0.617635	1
SERPINE1_P519_F	-0.00222	0.775909	1	0.617725	1
EPS8_E231_F	0.00227	0.776589	1	0.617931	1
SLC22A18_P216_R	0.00207	0.787183	1	0.621125	1
MGMT_P281_F	-0.00207	0.791241	1	0.622334	1
TEK_E75_F	-0.00202	0.795759	1	0.623672	1
HPN_P823_F	0.00183	0.801219	1	0.625275	1
IGFBP3_E65_R	-0.00192	0.807982	1	0.627243	1
IGSF4C_E65_F	0.00187	0.813666	1	0.62888	1
EPHA7_E6_F	-0.00179	0.817734	1	0.630043	1
HOXB2_P99_F	-0.0017	0.825896	1	0.632355	1
TMEFF1_P626_R	0.00165	0.827529	1	0.632815	1
HLA_DOA_P191_R	-0.00167	0.831234	1	0.633852	1
KRT5_P308_F	-0.00161	0.832398	1	0.634177	1
PTK7_E317_F	-0.00143	0.837342	1	0.635549	1
OAT_P465_F	0.00163	0.837864	1	0.635694	1
PDGFRB_P273_F	-0.00162	0.83848	1	0.635864	1
ETV1_P515_F	-0.00151	0.844754	1	0.637588	1
SPDEF_E116_R	0.00152	0.845491	1	0.63779	1
BCL3_E71_F	0.00153	0.845716	1	0.637851	1
CRIP1_P274_F	0.00151	0.847233	1	0.638265	1
MYLK_E132_R	-0.0011	0.848938	1	0.638729	1
GPX3_E178_F	-0.00145	0.852749	1	0.639762	1
SLIT2_E111_R	-0.00143	0.852871	1	0.639795	1
DNMT2_P199_F	-0.00138	0.858313	1	0.64126	1
TNK1_P221_F	0.00135	0.861235	1	0.642041	1
NGFR_P355_F	-0.0013	0.866794	1	0.643518	1
CSK_P740_R	0.0013	0.868703	1	0.644023	1
PECAM1_E32_R	-0.00124	0.870888	1	0.644599	1
CCR5_P630_R	-0.00112	0.884143	1	0.648052	1
ITK_E166_R	-0.00113	0.886287	1	0.648604	1
EMR3_E61_F	-0.00108	0.887789	1	0.648989	1
EPHA8_P256_F	0.000893	0.893503	1	0.65045	1
IL10_P348_F	-0.00102	0.896244	1	0.651146	1
GDF10_E39_F	-0.00103	0.896475	1	0.651204	1
KLK10_P268_R	-0.00101	0.89813	1	0.651623	1
THY1_P20_R	-0.000944	0.903302	1	0.652925	1
MMP14_P208_R	-0.000925	0.905666	1	0.653517	1
TIE1_E66_R	-0.000896	0.907448	1	0.653962	1
INS_P248_F	0.000876	0.91137	1	0.654938	1
KRAS_E82_F	0.000833	0.911527	1	0.654977	1
PTK6_E50_F	-0.000896	0.912778	1	0.655286	1
BMP4_P123_R	0.000846	0.914467	1	0.655704	1
TRIM29_E189_F	0.000685	0.919602	1	0.656967	1
SFTPB_P689_R	0.000545	0.943752	1	0.662785	1
EXT1_E197_F	0.000535	0.94554	1	0.663208	1
SMARCB1_P220_R	0.000509	0.94834	1	0.663868	1
GPX1_P194_F	0.000499	0.949458	1	0.664131	1
TM7SF3_P1068_R	0.000452	0.952878	1	0.664932	1
CDH1_P45_F	0.000432	0.955958	1	0.665651	1
RAD50_P191_F	-0.000422	0.957187	1	0.665937	1
S100A2_E36_R	-0.000367	0.962437	1	0.667153	1
BRCA1_P835_R	0.000351	0.963397	1	0.667374	1
LIF_P383_R	-0.000341	0.965013	1	0.667746	1
ARHGDIB_P148_R	-0.000298	0.968778	1	0.668609	1
UNG_P170_F	-0.000265	0.973231	1	0.669625	1
GABRB3_P92_F	0.000222	0.977719	1	0.670642	1
FGFR2_P460_R	0.000193	0.98036	1	0.671237	1
EPHB1_P503_F	-0.000186	0.980919	1	0.671363	1
PXN_P308_F	-0.000165	0.982196	1	0.67165	1
CHI3L2_E10_F	-0.000157	0.983924	1	0.672038	1
BMP3_E147_F	0.000128	0.986745	1	0.672668	1
NPR2_P618_F	-7.84e-05	0.990973	1	0.673609	1
MCM2_P260_F	3.87e-05	0.995348	1	0.674577	1
GRB10_P496_R	-2.42e-05	0.997477	1	0.675046	1
DSG1_E292_F	-0.0141221	1	1	0.675599	1
